# Supplementary material for: Comparison between different mesoporous carbons in the removal of doxycycline antibiotic: experimental assays and description of adsorbate features by density functional theory (DFT)
Source: Royal Society of Chemistry journal article supplement (doi:10.1039/d5en00336a), 2025-01-01
Supplement: d5en00336a1.pdf [file d5en00336a1.pdf]

## Supporting Information

### **Comparison Between Different Mesoporous Carbons in the Removal of Doxycycline Antibiotic: Experimental Assays and Description of Adsorbate Features by Density Functional Theory (DFT)**

Tauany de Figueiredo Neves<sup>a,b</sup>, Thayna Reis<sup>a</sup>, Natália Gabriele Camparotto<sup>a</sup>, Maria Vitória Rapôso<sup>a</sup>, Valmor Roberto Mastelaro<sup>c</sup>, Rafael L. Oliveira<sup>d,\*</sup> and Patrícia Prediger<sup>a,\*</sup>

<sup>a</sup> School of Technology, University of Campinas, 13484-332, Limeira, São Paulo, Brazil.

<sup>b</sup> Faculty of Philosophy, Sciences and Letters of Ribeirão Preto, University of São Paulo, 14040-901, Ribeirão Preto, São Paulo, Brazil.

<sup>c</sup> Institute of Physics, University of São Paulo, 13566-590, São Carlos, São Paulo, Brazil.

<sup>d</sup> Institute of Low Temperature and Structure Research of the Polish Academy of Sciences, 50-422, Wrocław, Poland.

\*Corresponding author e-mail address: [prediger@unicamp.br](mailto:prediger@unicamp.br); [r.oliveira@intibs.pl](mailto:r.oliveira@intibs.pl); Telephone number: +55 192113-3406; +48713954152

## 1. Characterization of prepared MPC

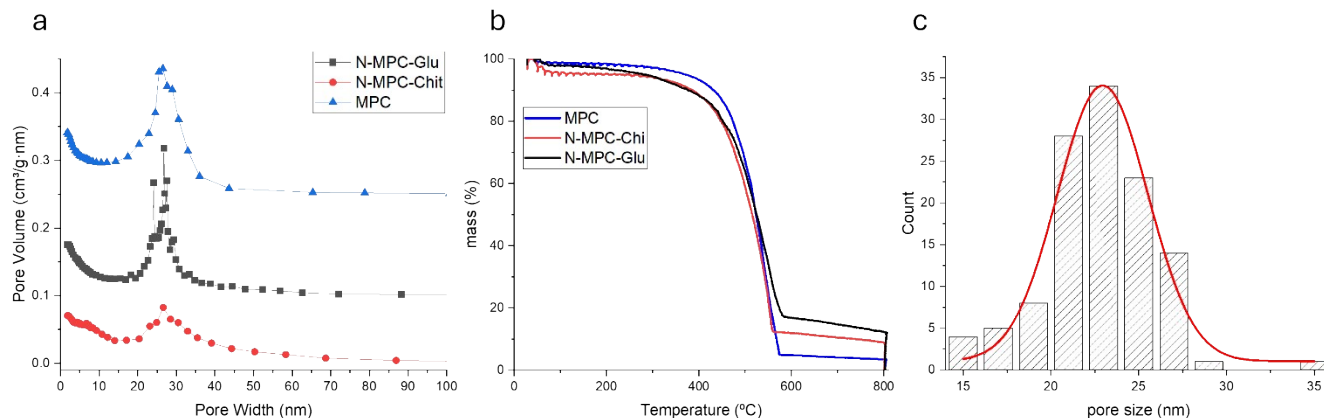

**Figure S1** – (a) Pore size distribution of the carbonaceous materials, the distributions of N-MPC-Glu and MPC were offset by 0.1 and 0.25, respectively: (b)—TG analysis of carbonaceous materials, (c) pore size distribution of N-MPC-Chit derived from TEM analyses.

## 2. XPS analysis of prepared MPC

**Table S1** – C-bond distributions from C1s XPS spectrum

| Material  | Csp <sup>2</sup> (%) | Csp <sup>3</sup> (%) | C=O (%) | O-C=O (%) | O-C-O (%) | Carbonates (%) |
|-----------|----------------------|----------------------|---------|-----------|-----------|----------------|
| MPC       | 53.2                 | 30                   | 9.5     | 4.6       | 2.7       | -              |
| N-MPC-Chi | 58.5                 | 22.1                 | 8.7     | 5.0       | 3.7       | 2.0            |
| N-MPC-Glu | 68.7                 | 19.7                 | 6.3     | 5.3       | -         | -              |

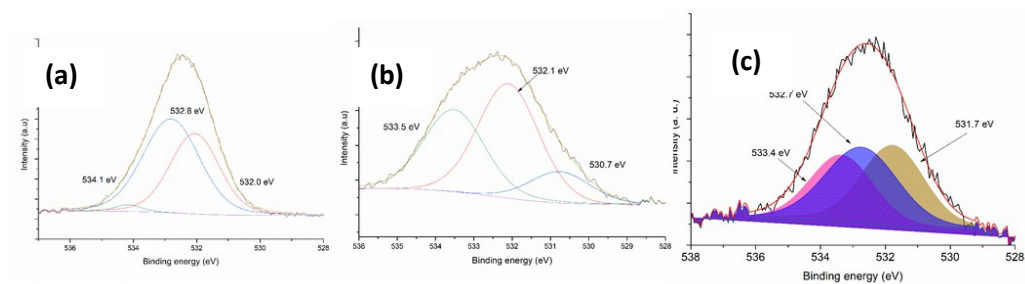

**Figure S2** – O1s XPS spectrum of MPC (a); N-MPC-Chi (b); N-MPC-Glu (c).

**Table S2** O-bond distributions from the O1s XPS spectrum

| Material  | Energy binding, percentage, functional group |             |                   |
|-----------|----------------------------------------------|-------------|-------------------|
| MPC       | 532.0 eV; 41.9%,                             | 532.8 eV,   | 534.1 eV, 1.9%,   |
|           | COOH                                         | 56.2%, C-OH | C–O in anhydrides |
| N-MPC-Chi | 531.7 eV, 28.2%,                             | 532.7 eV,   | 533.4 eV 34.6%,   |
|           | COOH                                         | 37.2%, C-OH | C=O               |
| N-MPC-Glu | 530.7 eV, 13.4%,                             | 532.1 eV,   | 533.5 eV,         |
|           | adsorbed H <sub>2</sub> O                    | 49.2%, COOH | 37.4%, C=O        |

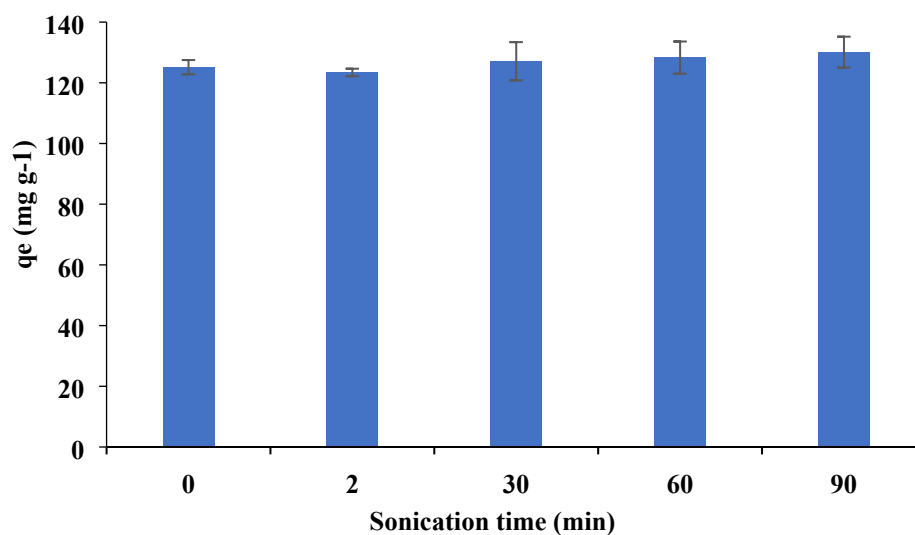

**Figure S3**– Influence of sonication assistance in the removal of DOX by N-MPC-Chi

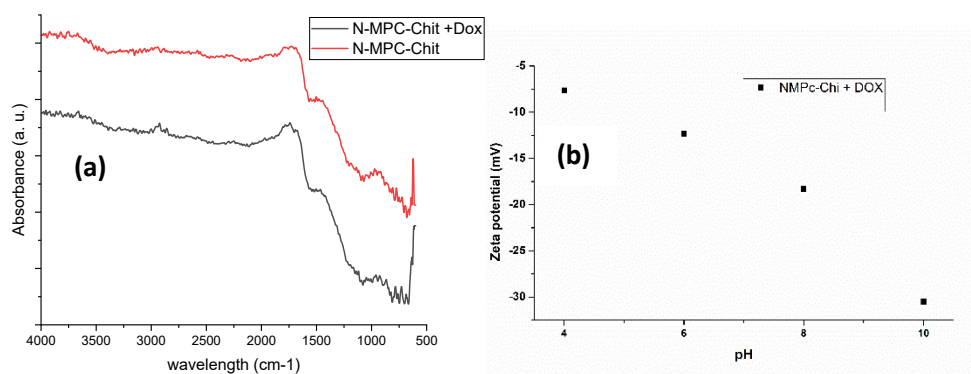

**Figure S4** – (a) ATR-FTIR spectra of N-MPC-Chi and N-MPC-Chi/DOX loaded. (b) Zeta potential measurements of N-MPC-Chi + DOX.
